# Supplementary material for: A fast self-cleaning SERS-active substrate based on an inorganic–organic hybrid nanobelt film
Source: Royal Society of Chemistry journal article supplement (doi:10.1039/c5cp02286j), 2015-01-01
Supplement: c5cp02286j1.pdf [file c5cp02286j1.pdf]

## Supporting Information

### A Fast Self-Cleaning SERS-Active Substrate Based on Inorganic–Organic Hybrid Nanobelts Film

Rui Hao<sup>†</sup>, Jie Lin<sup>†</sup>, Hua Wang,<sup>\*</sup> Bo Li, Fengshi Li, and Lin Guo<sup>\*</sup>

School of Chemistry and Environment, Beihang University, Beijing 100191, P.R. China

E-mail: wanghua8651@buaa.edu.cn; guolin@buaa.edu.cn

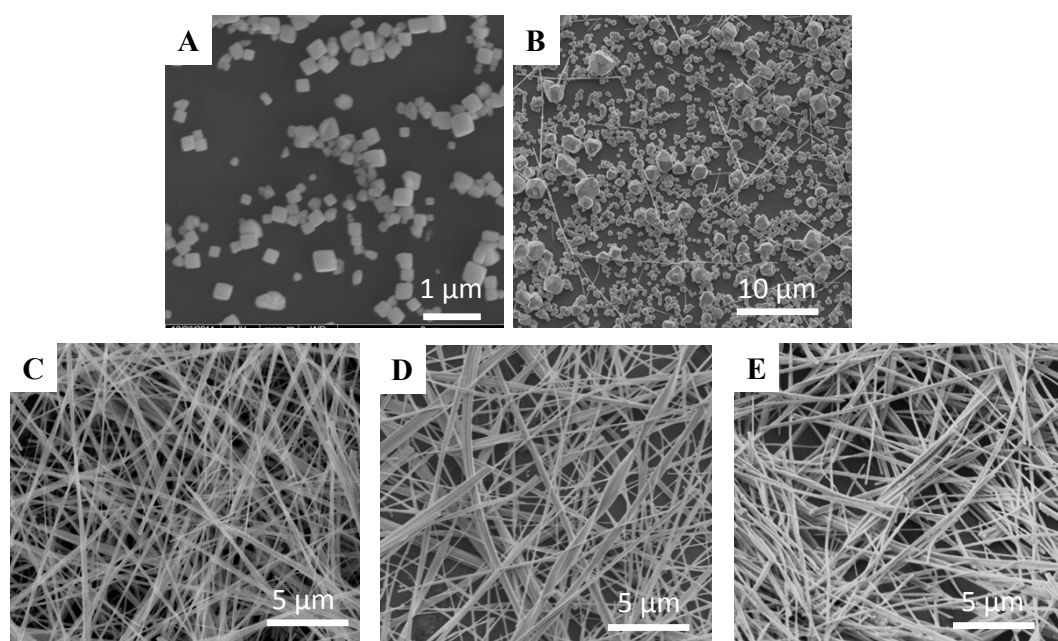

**Fig. S1** SEM images of the samples prepared with different hydrothermal reaction time: (A) 0 h; (B) 1 h; (C) 2 h; (D) 4 h; (E) 6 h.

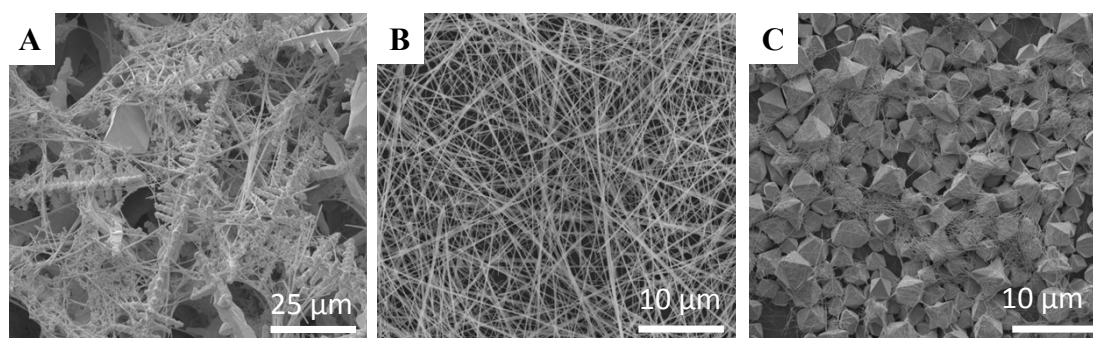

**Fig. S2** SEM images of the samples prepared with different mass of added PVP: (A) 0 g; (B) 0.054 g; (C) 0.54 g.

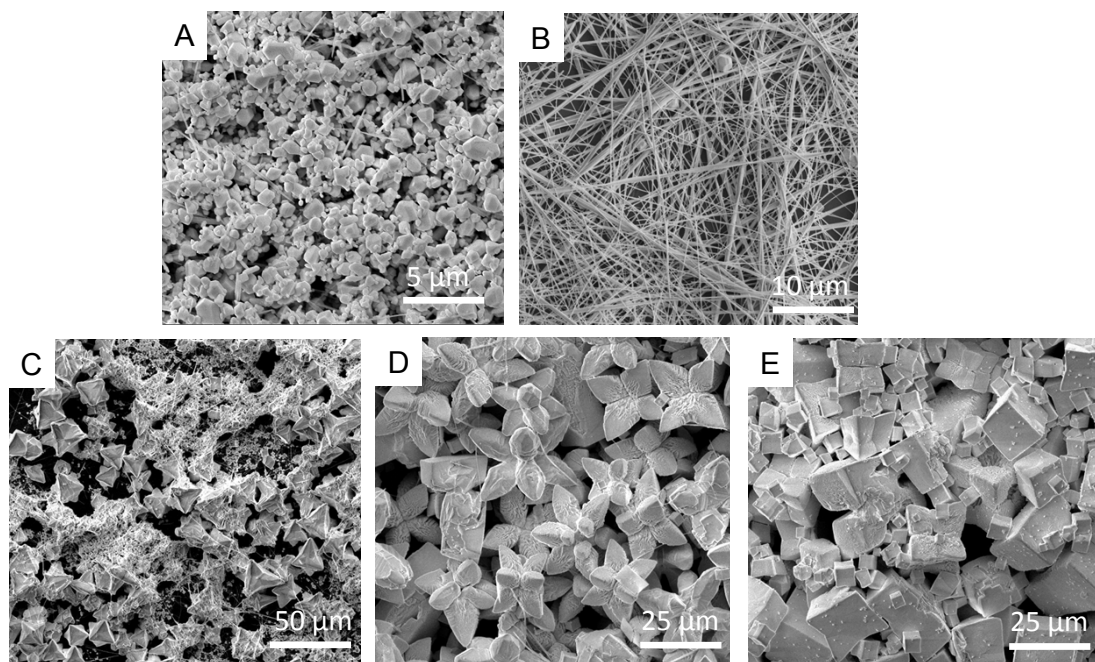

**Fig. S3** SEM images of the samples prepared with different mass of added NaCl: (A) 0.0256 g; (B) 0.768 g; (C) 1.28 g; (D) 1.792 g; (E) 2.56 g.

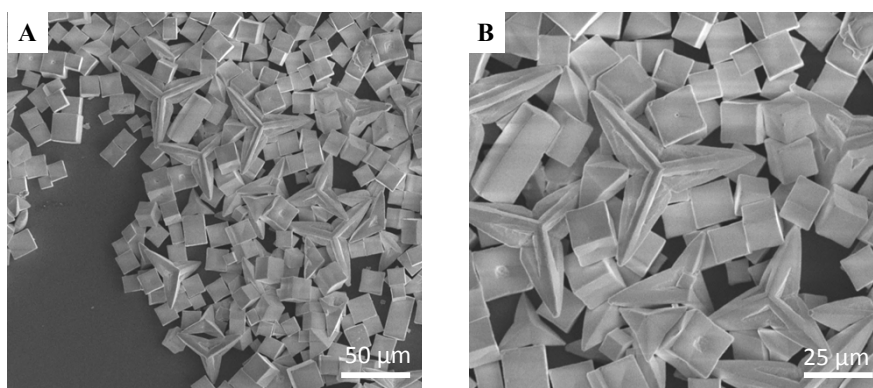

**Fig. S4** (A, B) SEM images of the sample prepared with  $\text{AgNO}_3$  as silver source.

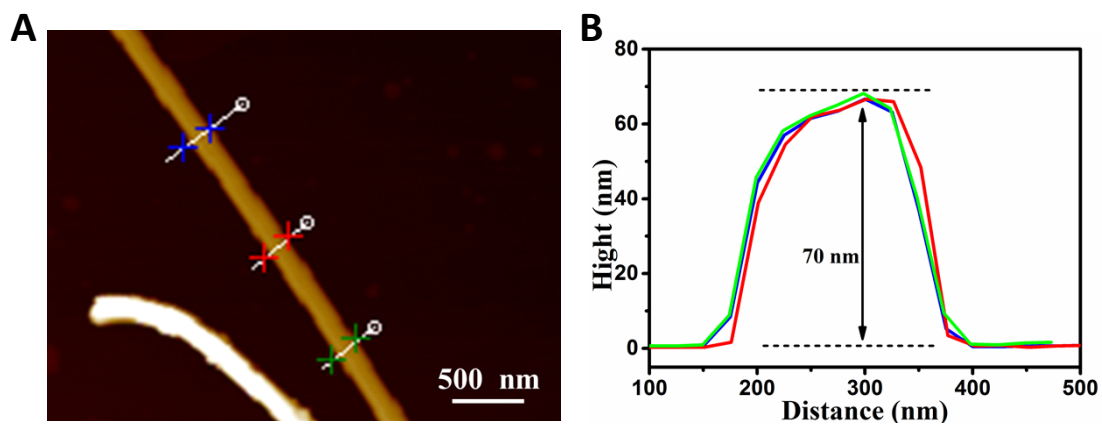

**Fig. S5** (A) AFM image and (B) the corresponding height profiles of  $\text{Ag@Ag(DMSO)}_x\text{Cl}$  nanobelts.

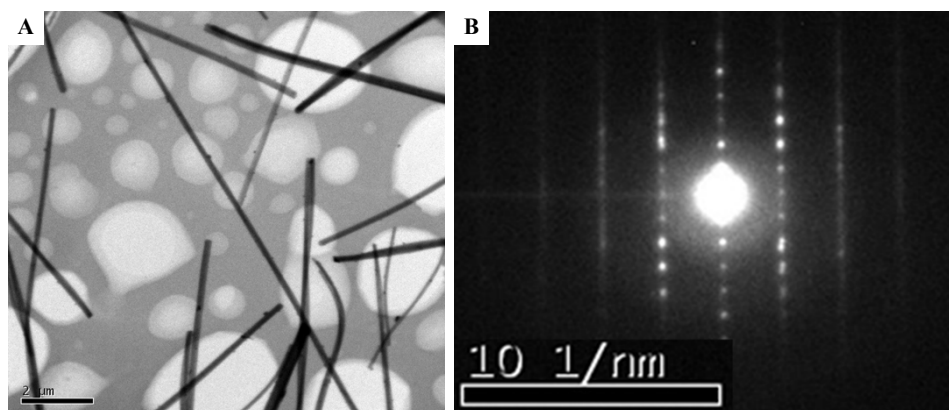

**Fig. S6** (A, B) TEM and SAED images of  $\text{Ag@Ag(DMSO)}_x\text{Cl}$  nanobelts.

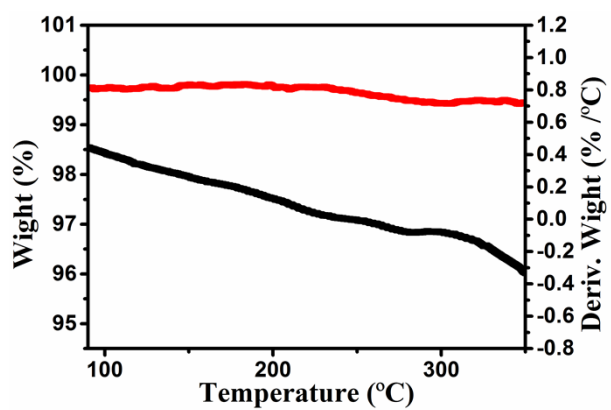

**Fig. S7** TGA and DTG curves of pure AgCl product.

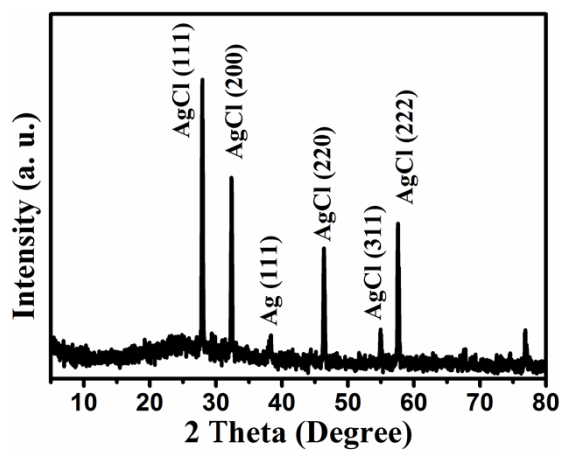

**Fig. S8** The XRD of the as-prepared  $\text{Ag@Ag(DMSO)}_x\text{Cl}$  nanobelts after calcination at 230 °C in  $\text{N}_2$  atmosphere.

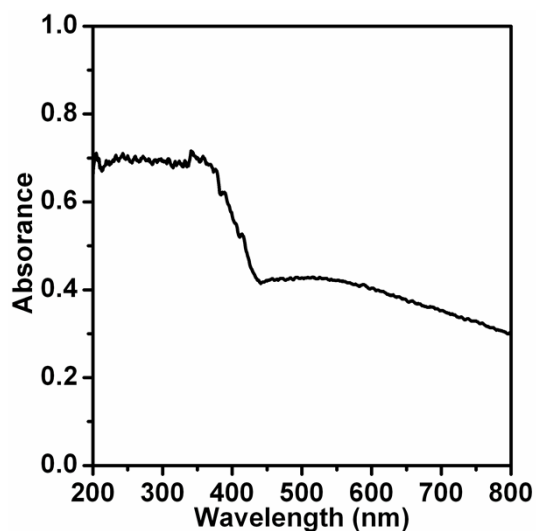

**Fig. S9** DRS of as-prepared  $\text{Ag@Ag(DMSO)}_x\text{Cl}$  nanobelts.

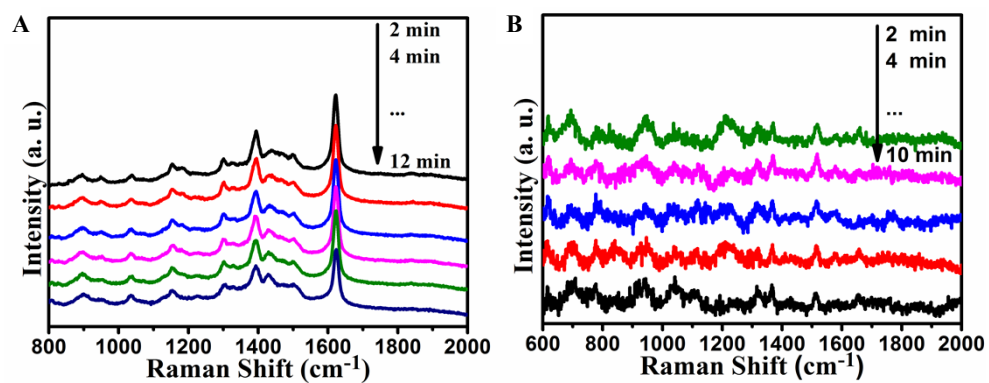

**Fig. S10** Raman spectra of pure MB (A) and R 6G (B) dye molecules.

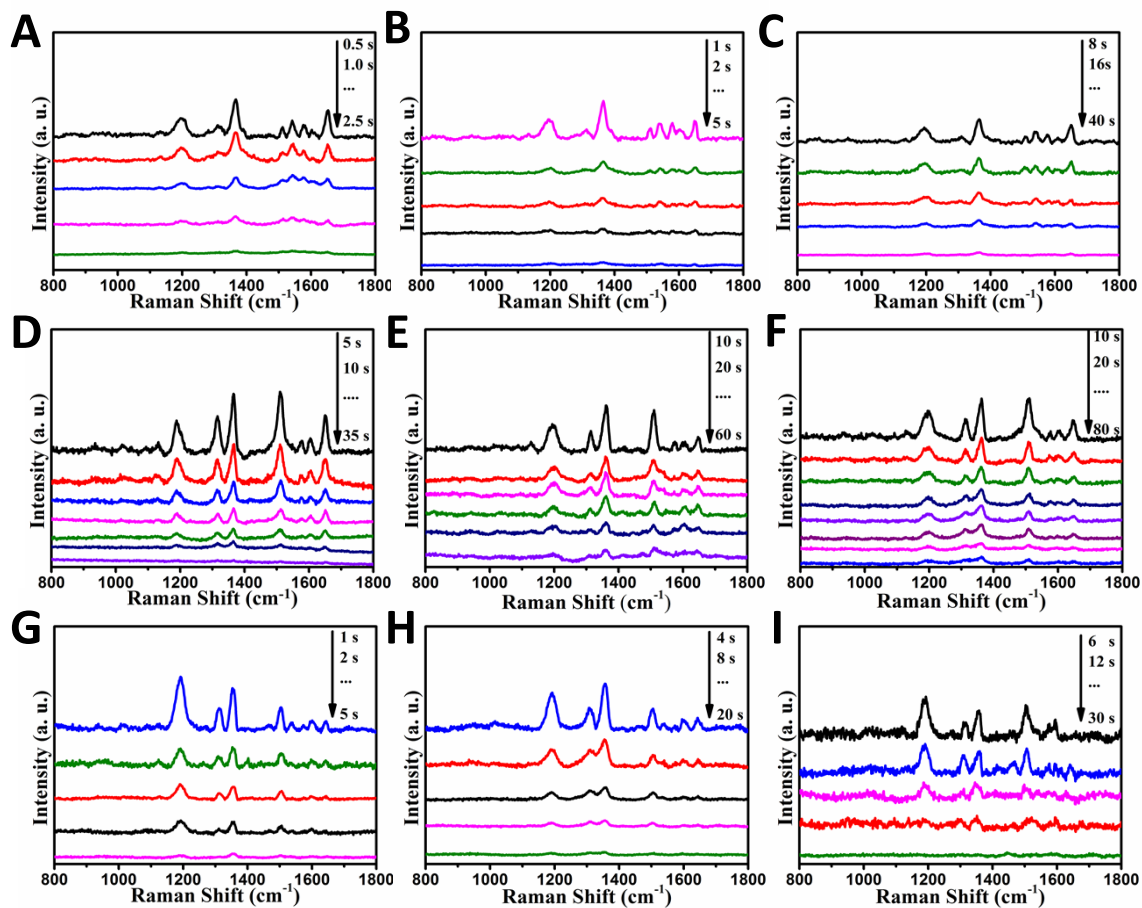

**Fig. S11** SERS spectra of R 6G under uninterrupted measurement with different laser power and laser wavelength. A) 514 nm, 10 mW; B) 514 nm, 5 mW; C) 514 nm, 2.5 mW; D) 633 nm, 1.5 mW; E) 633 nm, 0.8 mW; F) 633 nm, 0.4 mW; G) 647 nm, 10 mW; H) 647 nm, 5 mW; I) 647 nm, 2.5 mW.
